# Supplementary material for: Pbx loss in cranial neural crest, unlike in epithelium, results in cleft palate only and a broader midface
Source: PubMed Central journal article supplement (PMC6036936; doi:10.1111/joa.12821), 2018-05-23
Supplement: JOA-233-222-s010.pdf [file JOA-233-222-s010.pdf]

Supplementary Figure 7.

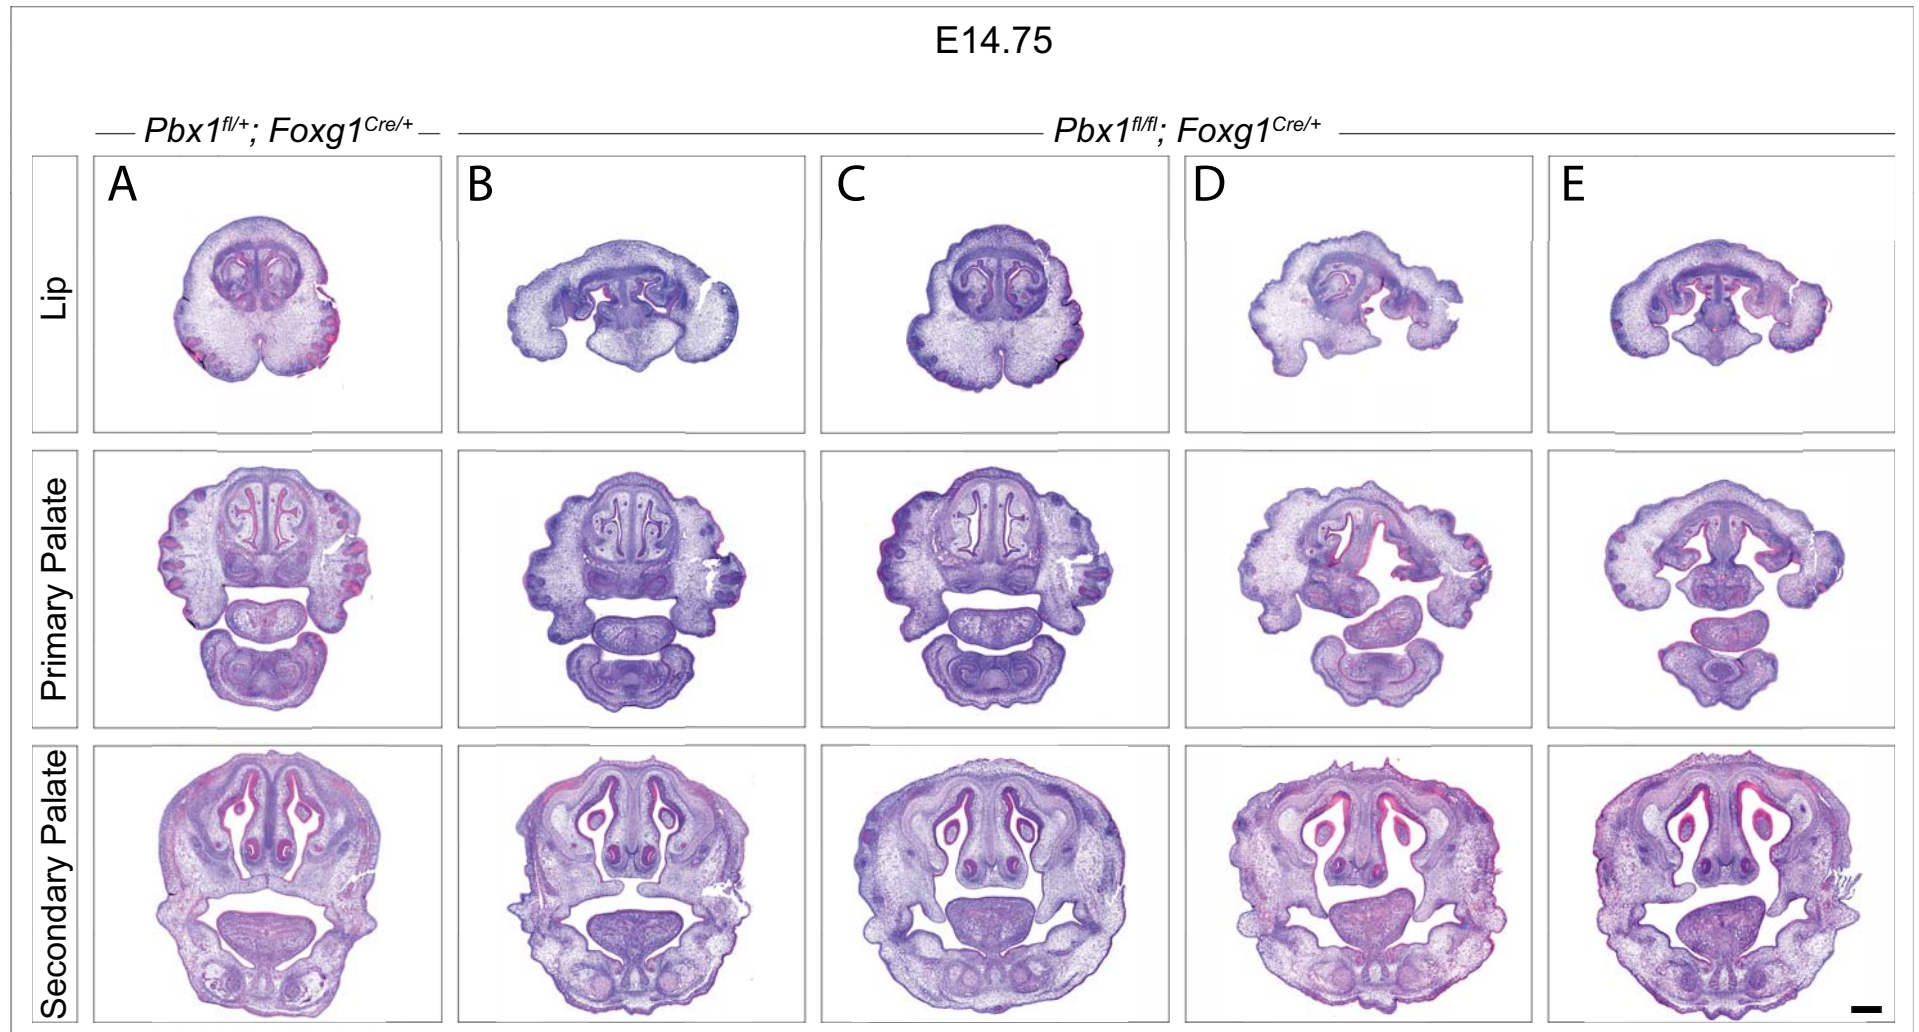

Supplementary Table 1:

|    | Unilateral Cleft Lip<br>Normal Primary Palate<br>Normal 2° Palate | Normal Lip<br>Normal Primary Palate<br>Cleft 2° Palate | Unilateral Cleft Lip<br>Unilateral Cleft Primary Palate<br>Cleft 2° Palate | Bitilateral Cleft Lip<br>Bitilateral Primary Palate<br>Cleft 2° Palate |
|----|-------------------------------------------------------------------|--------------------------------------------------------|----------------------------------------------------------------------------|------------------------------------------------------------------------|
| N: | 1                                                                 | 7                                                      | 8                                                                          | 5                                                                      |
| %: | 5%                                                                | 33%                                                    | 38%                                                                        | 24%                                                                    |

Total number of *Pbx1*<sup>fl/fl</sup>; *Foxg1*<sup>Cre/+</sup> mutant embryos examined: 21  
 Total number of litters/embryos\* harvested: 11/102  
 \* no craniofacial defects were observed in littermate controls
