# Supplementary material for: Pbx loss in cranial neural crest, unlike in epithelium, results in cleft palate only and a broader midface
Source: PubMed Central journal article supplement (PMC6036936; doi:10.1111/joa.12821), 2018-05-23

Supplementary Figure 8.

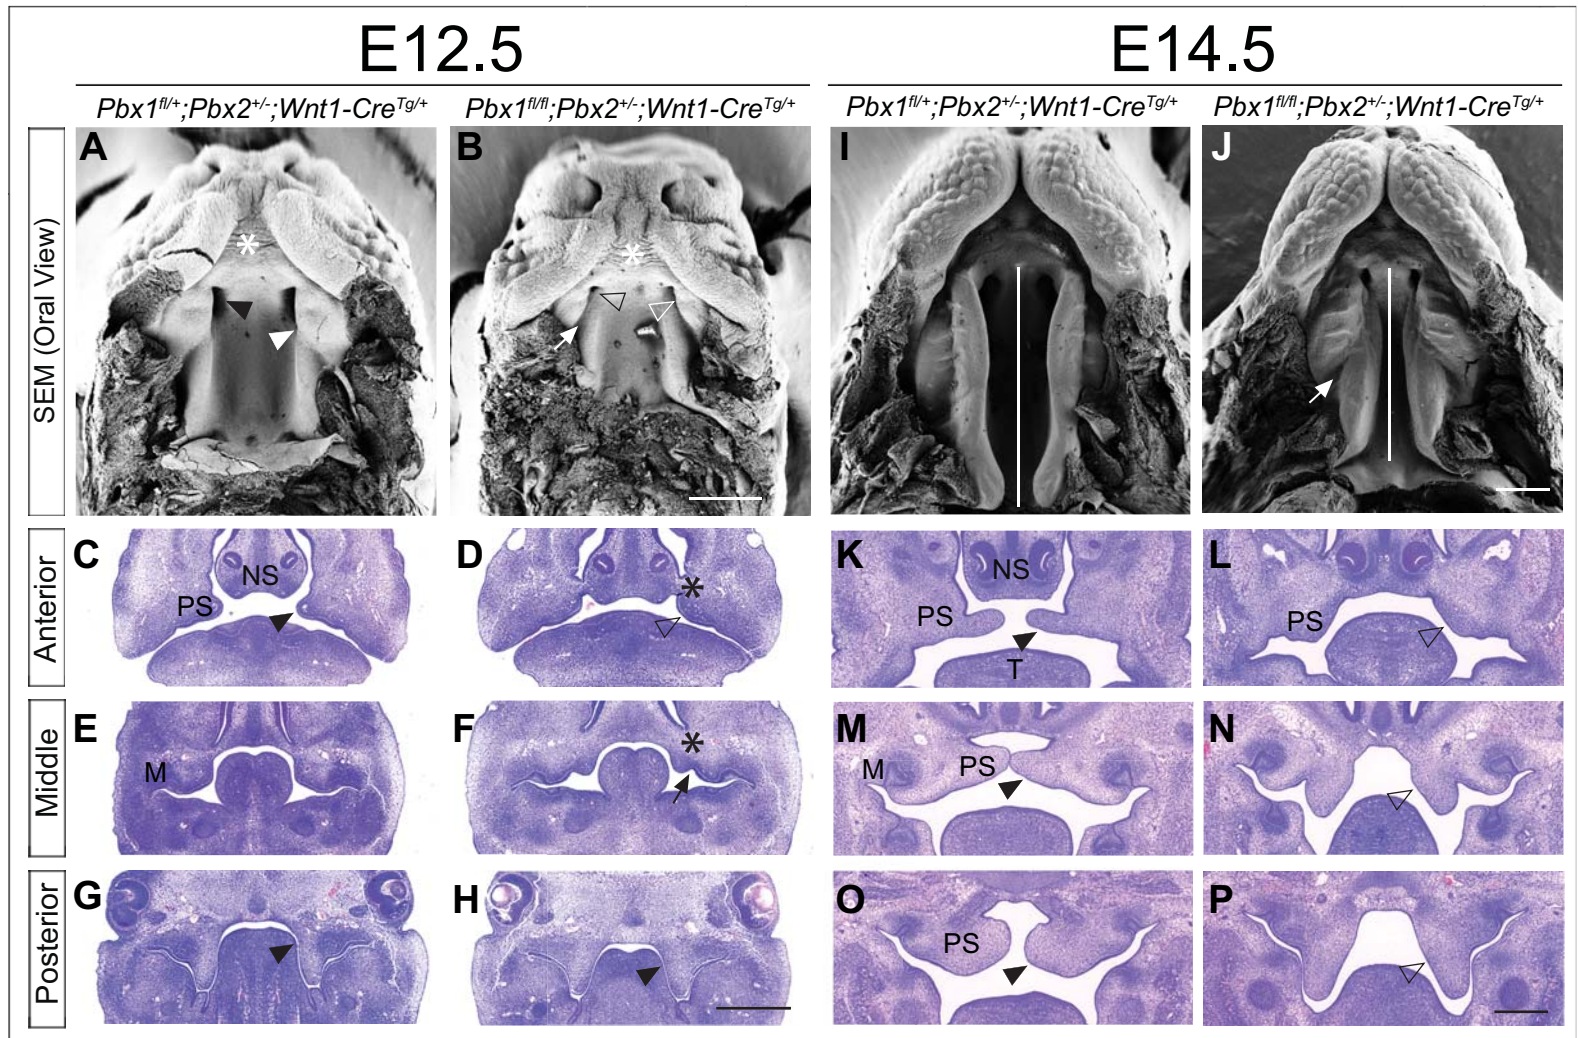

Supplement: JOA-233-222-s011.pdf [file JOA-233-222-s011.pdf]
