# Supplementary material for: Pbx loss in cranial neural crest, unlike in epithelium, results in cleft palate only and a broader midface
Source: PubMed Central journal article supplement (PMC6036936; doi:10.1111/joa.12821), 2018-05-23
Supplement: JOA-233-222-s012.pdf [file JOA-233-222-s012.pdf]

lateral view

dorsal view

ventral view

wild type

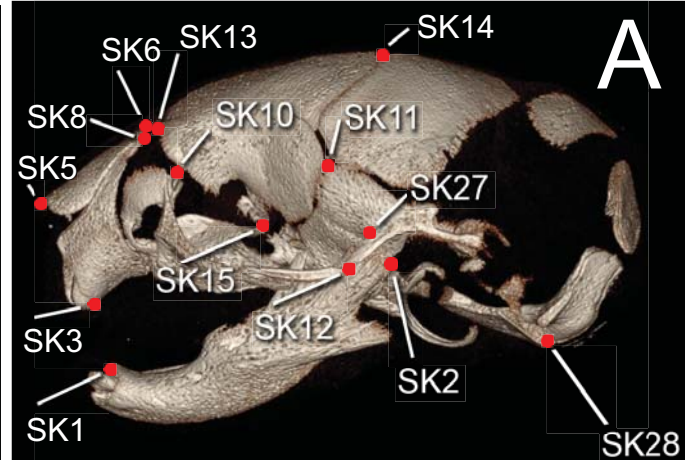

A

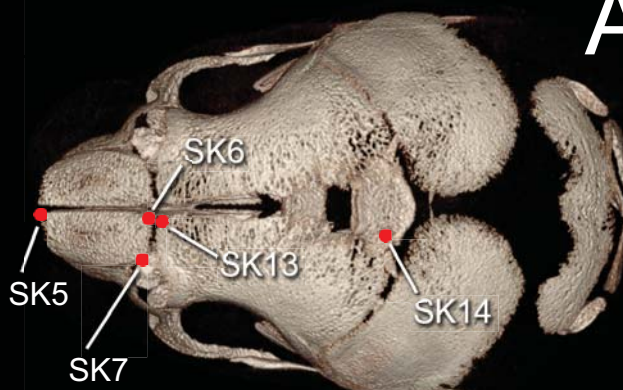

A'

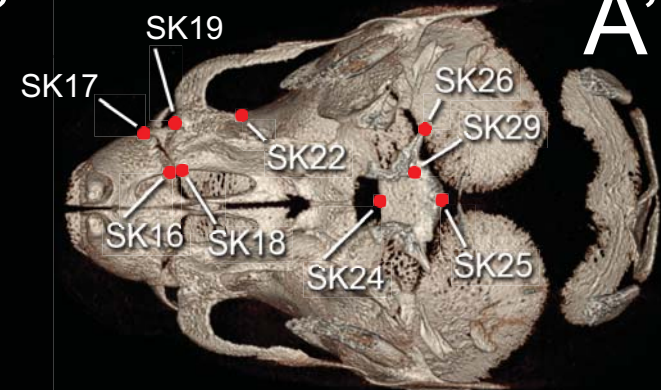

A''

Pbx1<sup>fl/fl</sup>; Pbx2<sup>+/-</sup>; Foxg1<sup>Cre/+</sup>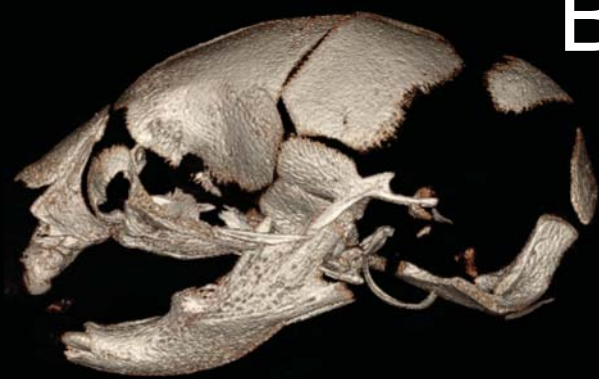

B

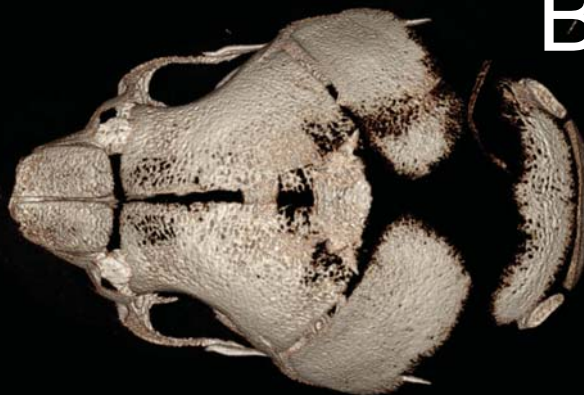

B'

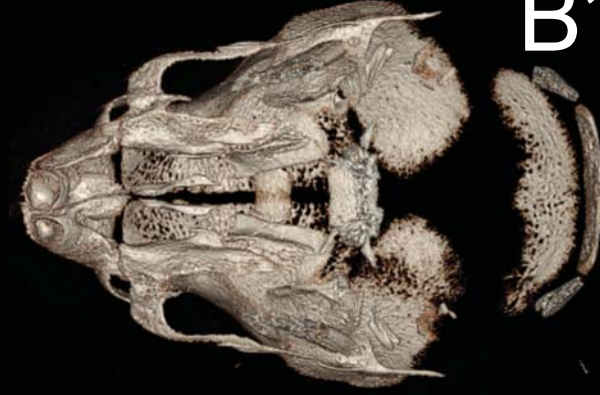

B''

Pbx1<sup>fl/fl</sup>; Pbx2<sup>+/-</sup>; Wnt1<sup>Cre/+</sup>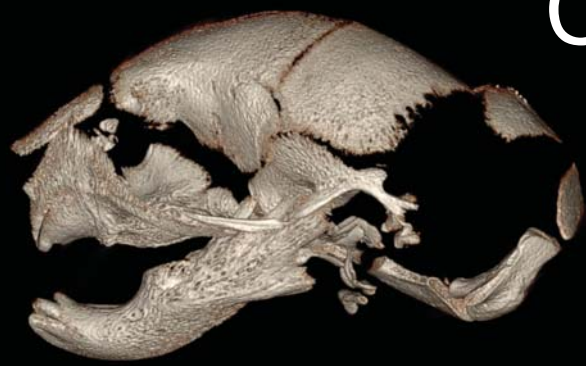

C

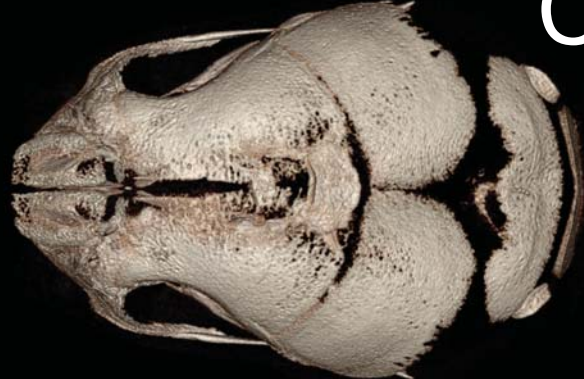

C'

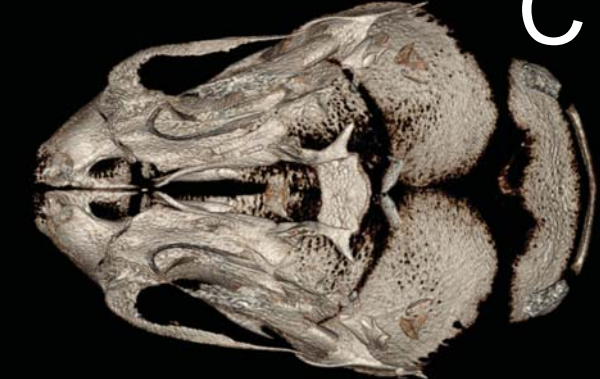

C''
